# Supplementary material for: Deep brain activities can be detected with magnetoencephalography
Source: PubMed Central journal article supplement (PMC6393515; doi:10.1038/s41467-019-08665-5), 2019-02-27
Supplement: 41467_2019_8665_MOESM2_ESM.pdf [file 41467_2019_8665_MOESM2_ESM.pdf]

Supplementary data file

## **Deep brain activities can be detected with magnetoencephalography**

Pizzo et al.

**Supplementary Data 1. MEG ICA characteristics**

| Patient number | Marker position (structure) | Lateralisation | number event marked | Filter  | Continuous analysis | Network type | Visibility vs background | Visibility during event | SEEG-correlated structures | Subdivision Hipp | Neocortex | Single dipole GOF (double dipole GOF) | Source localization [mesial vs other] | Structure included in source localization CI |
|----------------|-----------------------------|----------------|---------------------|---------|---------------------|--------------|--------------------------|-------------------------|----------------------------|------------------|-----------|---------------------------------------|---------------------------------------|----------------------------------------------|
| P1             | hipp                        | Le             | 108                 | 12-60Hz | no                  | M            |                          |                         | Hipp                       | tale             |           | 0.72 (0.87)                           | M                                     | Yes (Hipp; double dipole)                    |
|                |                             |                |                     |         | yes                 | M            |                          |                         | Hipp                       | tale             |           | 0.96                                  | central-post central                  | NA                                           |
| P2             | hipp                        | R              | 185                 | 12-60Hz | no                  | M            |                          |                         | Hipp; PH                   | head             |           | 0.47                                  | NA                                    | NA                                           |
|                |                             |                |                     |         | yes                 | M            |                          |                         | Hipp                       | head             |           | 0.8                                   | M                                     | Yes (Hipp)                                   |
|                |                             |                |                     |         | yes                 | M            |                          |                         | Hipp; PH                   | head             |           | 0.75                                  | NA                                    | NA                                           |
| P3             | hipp                        | Le             | 183                 | 2-60Hz  | no                  | ML           | 20                       |                         | Amy; PeriRh; NC            |                  | T         |                                       |                                       |                                              |
|                |                             |                |                     |         |                     | M            | 100                      |                         | Hipp                       | tale             |           | 0.86                                  | Le Insulo-opercular                   | NA                                           |
|                |                             |                |                     | 12-60Hz | no                  | M            | 15                       |                         | PeriRh; CS                 |                  |           | 0.9                                   | M                                     | Yes (PeriRh; CS)                             |
|                |                             |                |                     |         |                     | M            | 100                      |                         | Hipp; PH                   | head; tale       |           | 0.43 (0.79)                           | NA                                    | NA                                           |
|                |                             |                |                     | 2-60Hz  | yes                 | M            | 15                       |                         | PeriRh                     |                  |           | 0.9                                   | M                                     | No (Hipp)                                    |
|                |                             |                |                     |         |                     | M            | 150                      |                         | Hipp; PeriRh               | head             |           | 0.94                                  | M                                     | Yes (Hipp)                                   |
|                |                             |                |                     |         |                     | L            | 30                       |                         | NC                         |                  | T         | 0.82                                  | M, BiL T pole                         | NA                                           |
|                |                             |                |                     |         |                     | M            |                          |                         | PeriRh                     |                  |           | 0.36 (0.5)                            | NA                                    | NA                                           |
| 12-60Hz        | yes                         | M              | 10                  |         | CS                  |              |                          | 0.85                    | M                          | No               |           |                                       |                                       |                                              |

|    |      |   |    |         |     |    |    |    |                                       |      |   |                |    |                                   |
|----|------|---|----|---------|-----|----|----|----|---------------------------------------|------|---|----------------|----|-----------------------------------|
|    |      |   |    |         |     |    |    |    |                                       |      |   |                |    | (thalamus)                        |
|    |      |   |    |         |     | M  |    |    | PeriRh                                |      |   | 0.75<br>(0.95) | M  | Yes (PeriRh,<br>double<br>dipole) |
|    |      |   |    |         |     | M  |    |    | CS                                    |      |   | 0.7            | NA | NA                                |
|    |      |   |    |         |     | M  | 50 |    | Hipp                                  | head |   | 0.42<br>(0.8)  | NA | NA                                |
|    |      |   |    |         |     | M  |    |    | Hipp; PH                              |      |   | 0.73           | NA | NA                                |
| P4 | hipp | R | 99 | 2-60Hz  | no  | ML | 5  |    | Hipp; CS;<br>FusG; NC                 | head | T |                |    |                                   |
|    |      |   |    |         |     | L  |    |    | NC                                    |      | T | 0.9            | L  | No (parietal)                     |
|    |      |   |    |         |     | ML | 50 |    | Hipp; CS;<br>FusG; NC                 | head | T |                |    |                                   |
|    |      |   |    |         |     | eL |    |    | PeriRh;<br>PH; CS;<br>Amy; OTS;<br>TH |      |   |                |    |                                   |
|    |      |   |    | 12-60Hz | no  | ML |    |    | Hipp; CS;<br>FusG; NC                 | head | T |                |    |                                   |
|    |      |   |    |         |     | ML | 10 |    | Hipp; CS;<br>FusG; NC                 | head | T |                |    |                                   |
|    |      |   |    |         |     | ML |    |    | Hipp; EC;<br>CS; FusG;<br>NC          | head | T |                |    |                                   |
|    |      |   |    | 2-60Hz  | yes | ML | 5  | 15 | Hipp; CS;<br>FusG; NC                 | head | T |                |    |                                   |
|    |      |   |    |         |     | ML |    |    | CS; FusG;<br>NC                       | head | T |                |    |                                   |
|    |      |   |    |         |     | M  |    |    | Hipp                                  | head |   | 0.92           | M  | No<br>(thalamo-<br>cingular)      |

|  |      |    |    |         |     |    |    |    |                                        |      |   |      |            |                                |
|--|------|----|----|---------|-----|----|----|----|----------------------------------------|------|---|------|------------|--------------------------------|
|  |      |    |    |         |     |    |    |    |                                        |      |   |      |            | post)                          |
|  |      |    |    |         |     | ML | 30 |    | Hipp; CS;<br>FusG; NC                  | head | T |      |            |                                |
|  |      |    |    |         |     | eL |    |    | Amy; PHG;<br>CS; TH;<br>OTS; NC        |      | T |      |            |                                |
|  |      |    |    | 12-60Hz | yes | ML |    |    | Hipp; CS;<br>FusG; NC                  | head | T |      |            |                                |
|  |      |    |    |         |     | M  |    |    | CS                                     |      |   | 0.87 | Le central | NA                             |
|  |      |    |    |         |     | L  |    |    | NC                                     |      | T | 0.88 | L          | No (P)                         |
|  |      |    |    |         |     | ML |    |    | CS; PHG;<br>FusG; NC                   |      | T |      |            |                                |
|  |      |    |    |         |     | eL |    |    | Hipp; PH;<br>CS; NC; TH                | head | T |      |            |                                |
|  |      |    |    |         |     | ML |    |    | Hipp; CS;<br>NC                        | head | T |      |            |                                |
|  |      |    |    |         |     | ML | 50 |    | Hipp; CS;<br>PH; FusG;<br>NC           | head | T |      |            |                                |
|  | hipp | Le | 45 | 2-60Hz  | no  | eL | 5  | 30 | Amy; Hipp;<br>PH;<br>PeriRh;<br>NC; TH | head | T |      |            |                                |
|  |      |    |    |         |     | M  |    |    | Hipp; CS;<br>PH; FusG                  |      |   | 0.95 | M          | Yes<br>(Hipp; CS;<br>PH; FusG) |
|  |      |    |    | 12-60Hz | no  | eL | 10 |    | Amy; NC;<br>TH; Hipp ;<br>PH; PeriRh   | head |   |      |            |                                |
|  |      |    |    |         |     | L  |    |    | NC                                     |      | O | 0.88 | L          | Yes                            |
|  |      |    |    |         |     | ML |    |    | Hipp; CS;<br>FusG; OTS;                | head | T |      |            |                                |

|    |      |    |    |         |     |    |    |    |                                |      |   |                |                         |                       |
|----|------|----|----|---------|-----|----|----|----|--------------------------------|------|---|----------------|-------------------------|-----------------------|
|    |      |    |    |         |     |    |    |    | NC                             |      |   |                |                         |                       |
|    |      |    |    | 2-60Hz  | yes | ML | 30 |    | Hipp; CS;<br>FusG; OTS;<br>NC  | head | T |                |                         |                       |
|    |      |    |    |         |     | M  | 10 |    | Amy                            |      |   | 0.7            | NA                      | NA                    |
|    |      |    |    |         |     | M  |    |    | PeriRh                         |      |   | 0.86           | Central-post<br>central | NA                    |
|    |      |    |    |         |     | ML |    |    | Hipp; CS;<br>NC                | head | T |                |                         |                       |
|    |      |    |    |         |     | eL | 5  |    | Amy; NC;<br>CS; PH;<br>PeriRh  |      | T |                |                         |                       |
|    |      |    |    | 12-60Hz | yes | L  | 20 |    | NC                             |      | T | 0.91           | L                       | No (P)                |
|    |      |    |    |         |     | eL | 10 |    | Hipp; NC;<br>CS; TH;<br>PeriRh | head | T |                |                         |                       |
|    |      |    |    |         |     | ML |    |    | Hipp; NC;<br>CS                | head | T |                |                         |                       |
| P5 | hipp | R  | 16 | 2-60Hz  | no  | ML | 10 |    | EC; NC                         |      | T |                |                         |                       |
|    |      |    |    |         |     | M  | 5  | 10 | Amy                            |      |   | 0.92           | Me                      | Yes (amy)             |
| P6 | hipp | Le | 18 | 12-60Hz | yes | M  |    |    | CS                             |      |   | 0.95           | Le<br>prefrontal        | NA                    |
| P7 | amy  | R  | 33 | 2-60Hz  | no  | ML | 30 |    | Amy; OTS;<br>PeriRh; NC        |      | T |                |                         |                       |
|    |      |    |    | 12-60Hz | no  | ML |    |    | Amy;<br>PeriRh; NC             |      | T |                |                         |                       |
|    |      |    |    | 2-60Hz  | yes | ML |    |    | Amy; OTS;<br>PeriRh; NC        |      | T |                |                         |                       |
|    | hipp | Le | 22 | 2-60Hz  | no  | M  |    |    | Amy;<br>PeriRh                 |      |   | 0.92           | M                       | Yes (Amy;<br>PeriRh)  |
|    |      |    |    | 12-60Hz | no  | M  |    |    | Hipp                           | head |   | 0.79<br>(0.92) | M                       | Yes (Hipp,<br>double) |

|     |      |    |    |         |     |     |    |      |                            |        |      |             |            |                     |
|-----|------|----|----|---------|-----|-----|----|------|----------------------------|--------|------|-------------|------------|---------------------|
|     |      |    |    |         |     |     |    |      |                            |        |      |             |            | dipole)             |
| P8  | hipp | R  | 23 | 2-60Hz  | no  | meL | 20 |      | Hipp; TH                   | head   |      | 0.93        | M          | Yes (Hipp; TH)      |
|     |      |    |    | 2-60Hz  | no  | eL  | 20 |      | PeriRh; NC; TH             |        | T    |             |            |                     |
|     |      |    |    | 12-60Hz | no  | meL | 15 |      | Amy; Hipp; TH              | head   |      | 0.82        | M          | Yes (Hipp; TH)      |
|     |      |    |    | 12-60Hz | yes | meL | 15 |      | Hipp; TH                   | head   |      | 0.84        | M          | Yes (Hipp; TH)      |
| P9  | hipp | Le | 38 | 12-60Hz | no  | M   |    | Hipp | tale                       |        | 0.88 | M           | Yes (Hipp) |                     |
| P10 | amy  | Le | 32 | 2-60Hz  | no  | ML  | 30 |      | Amy; OTS                   |        |      |             |            |                     |
|     |      |    |    |         |     | L   |    |      | NC                         |        | T    | 0.65 (0.93) | L          | No (P)              |
|     |      |    |    | 12-60Hz | no  | meL | 10 |      | PeriRh; ins; Hipp; TH      | head   |      | 0.97        | M          | Yes (Hipp; TH)      |
|     |      |    |    |         |     | ML  | 30 |      | Hipp; NC                   | head   | T    |             |            |                     |
|     |      |    |    |         |     | L   |    |      | NC                         |        | P    | 0.39 (0.67) | NA         | NA                  |
|     |      |    |    | 2-60Hz  | yes | ML  | 15 |      | OTS                        |        |      |             |            |                     |
|     |      |    |    |         |     | L   |    |      | NC                         |        | P; T | 0.78        | L          | Yes (P)             |
|     |      |    |    | 12-60Hz | yes | meL |    |      | PeriRh; TH; Hipp; Amy; ins | head   |      | 0.9         | M          | Yes (TH, Hipp, Ins) |
| L   |      |    | NC |         |     |     | T  | 0.86 | L                          | No (P) |      |             |            |                     |
| P11 | hipp | R  | 55 | 12-60Hz | no  | meL | 50 |      | TH; putamen; ins           |        |      | 0.83        | M          | Yes (TH)            |
|     |      |    |    | 2-60Hz  | yes | meL |    |      | TH                         |        |      | 0.87        | M          | Yes (TH)            |
|     |      |    |    | 12-60Hz | yes | meL |    |      | TH; FusG                   |        |      | 0.88        | M          | Yes (TH)            |
| P12 | hipp | Le | 53 | 2-60Hz  | no  | meL | 50 |      | Hipp; TH                   | head   |      | 0.9         | M          | Yes                 |

|     |     |    |     |         |     |     |         |     |                      |      |             |                           |                |              |                                |   |        |
|-----|-----|----|-----|---------|-----|-----|---------|-----|----------------------|------|-------------|---------------------------|----------------|--------------|--------------------------------|---|--------|
|     |     |    |     |         |     | ML  | 15      |     | Amy; NC              |      | T           |                           |                | (Hipp; TH)   |                                |   |        |
|     |     |    |     | 12-60Hz | no  | M   | 10      | 50  | Amy; Hipp            | head |             | 0.96                      | M              | No (thal)    |                                |   |        |
|     |     |    |     |         |     | meL | 50      |     | TH                   |      |             | 0.89                      | M              | Yes (TH)     |                                |   |        |
|     |     |    |     | 2-60Hz  | yes | M   | 5       |     | Amy                  |      |             | 0.92                      | M              | No (Hipp)    |                                |   |        |
|     |     |    |     | 12-60Hz | yes | M   | 20      |     | Hipp; Amy            |      |             | 0.86                      | M              | Yes (Hipp)   |                                |   |        |
|     |     |    |     |         |     | M   | 5       |     | Hipp; Amy            |      |             |                           | 0.92           | Le occipital | NA                             |   |        |
|     |     |    |     |         |     | eL  |         |     | Hipp; NC             | tale | T;<br>OF    |                           |                |              |                                |   |        |
|     |     |    |     |         |     | M   |         |     | Amy                  |      |             |                           | 0.68<br>(0.91) | M            | No (Hipp:<br>double<br>dipole) |   |        |
| P13 | amy | Le | 145 | 2-60Hz  | no  | ML  | 10      | 30  | Amy; EC;<br>OTS      |      |             |                           |                |              |                                |   |        |
|     |     |    |     |         |     | eL  |         |     | Ins; NC; EC          |      | T           |                           |                |              |                                |   |        |
|     |     |    |     |         |     | L   |         |     | NC                   |      | T           | 0.79 (0.95)               | L              | Yes (T)      |                                |   |        |
|     |     |    |     |         |     | L   |         |     | NC                   |      | T           | 0.89                      | L              | Yes (T)      |                                |   |        |
|     |     |    |     |         |     | eL  |         |     | Amy; OTS;<br>Ins; NC |      | T           |                           |                |              |                                |   |        |
|     |     |    |     |         |     |     | 12-60Hz | no  | L                    |      |             | NC                        |                | F            | 0.97                           | L | No (P) |
|     |     |    |     | L       |     |     |         |     | NC                   |      | F           | 0.91                      | L              | Yes (F)      |                                |   |        |
|     |     |    |     | ML      | 20  |     |         |     | Amy; OTS;<br>NC      |      | F; T        |                           |                |              |                                |   |        |
|     |     |    |     | L       |     |     |         |     | NC                   |      | T           | 0.89                      | L              | Yes (T)      |                                |   |        |
|     |     |    |     |         |     |     | 2-60Hz  | yes | ML                   |      |             | EC; NC                    |                | T            |                                |   |        |
|     |     |    | L   | 50      |     | NC  |         |     |                      | T    | 0.82 (0.96) | M<br>(Thalamic/T<br>pole) | NA             |              |                                |   |        |

|     |     |   |    |         |     |    |      |      |                      |         |          |             |   |         |
|-----|-----|---|----|---------|-----|----|------|------|----------------------|---------|----------|-------------|---|---------|
|     |     |   |    |         |     | eL | 15   |      | Amy; OTS;<br>Ins; NC |         | T        |             |   |         |
|     |     |   |    |         |     | L  |      |      | NC                   |         | T        | 0.78        | L | Yes (T) |
|     |     |   |    |         |     | eL |      |      | NC                   |         | T;<br>OF |             |   |         |
|     |     |   |    | 12-60Hz | yes | ML |      |      | Amy; OTS;<br>NC      |         | T; F     |             |   |         |
| P14 | amy | R | 86 | 2-60Hz  | no  | L  |      |      | NC                   |         | T        | 0.93        | L | Yes (T) |
|     |     |   |    |         |     | L  |      |      | NC                   |         | T        | 0.77 (0.91) | L | Yes (T) |
|     |     |   |    | 12-60Hz | no  | L  |      |      | NC                   |         | T        | 0.95        | L | Yes (T) |
|     |     |   |    |         |     | L  |      |      | NC                   |         | T; F     | 0.73 (0.97) | L | Yes (T) |
|     |     |   |    |         |     | L  |      |      | NC                   |         | T; F     | 0.88        | L | Yes (T) |
|     |     |   |    |         |     | L  |      |      | NC                   |         | T; F     | 0.83        | L | Yes (T) |
|     |     |   |    |         |     | ML |      |      | Amy; NC              |         | T; F     |             |   |         |
|     |     |   |    |         |     | L  |      |      | NC                   |         | T        | 0.88        | L | Yes (T) |
|     |     |   |    | 2-60Hz  | yes | L  |      |      | NC                   |         | T        | 0.91 (0.98) | L | Yes (T) |
|     |     |   |    |         |     | L  |      |      | NC                   |         | T        | 0.94        | L | Yes (T) |
|     |     |   |    |         |     | L  |      |      | NC                   |         | T        | 0.6 (0.82)  | L | No (P)  |
|     |     |   |    | 12-60Hz | yes | L  |      |      | NC                   |         | T        | 0.93        | L | Yes (T) |
|     |     |   |    |         |     | L  |      |      | NC                   |         | T        | 0.91        | L | Yes (T) |
|     |     |   |    |         |     | L  |      |      | NC                   |         | T        | 0.93        | L | Yes (T) |
| L   |     |   | NC |         |     |    | T; F | 0.95 | L                    | Yes (T) |          |             |   |         |
| L   |     |   | NC |         |     |    | T    | 0.96 | L                    | Yes (T) |          |             |   |         |

**Legenda:** hipp- hippocampus-; amy – amygdala-; R –right-; Le –left-; M – mesial-; L – Lateral-; ML –mesioLateral-; eL – extended limbic-; PH – parahippocampal gyrus-; PeriRh –preirhinal cortex-; CS –collateral sulcus- FusG – fusiform gyrus-; OTS – occipito-temporal sulcus-; TH –thalamus-; EC entorhinal cortex-; ins – insula-; NC – neocortex-; OF – orbitofrontal ; T – temporal-; F –frontal-; P –parietal- O -occipital. NA: not applicable
